# Supplementary material for: γ-valerolactone (GVL) as a bio-based green solvent and ligand for iron-mediated AGET ATRP
Source: publisher site journal article supplement (doi:10.1515/epoly-2019-0033), 2019-05-29
Supplement: Supplementary file 1 [file epoly-2019-0033_sm.pdf]

## Communication

## Open Access

XianRong Shen\*, DengZhou Xia, YiXin Xiang and JianGang Gao

# $\gamma$ -valerolactone (GVL) as a bio-based green solvent and ligand for iron-mediated AGET ATRP

## Supplementary material

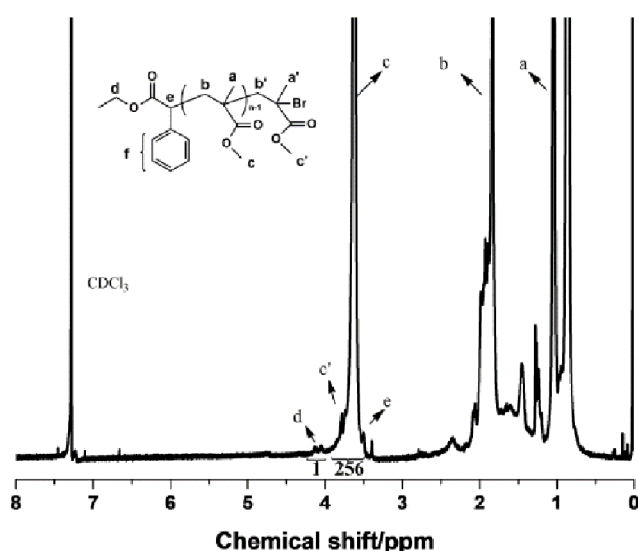

**Figure S1:**  $^1\text{H}$  NMR spectrum of PMMA ( $M_{n,\text{NMR}} = 17.3 \times 10^3$  g/mol,  $M_{n,\text{GPC}} = 15.9 \times 10^3$  g/mol,  $M_w/M_n = 1.27$ ) with  $\text{CDCl}_3$  as the solvent. Experiment conditions:  $[\text{MMA}]_0/[\text{EBPA}]_0/[\text{FeBr}_3]_0/[\text{AsAc-Na}]_0 = 200/1/0.5/1$  at  $75^\circ\text{C}$ . Solvent =  $\gamma$ -valerolactone,  $V_{\text{MMA}} = 3$  mL,  $V_{\text{solvent}} = 1.5$  mL. Reaction time = 5 h. Conversion = 70.1%.

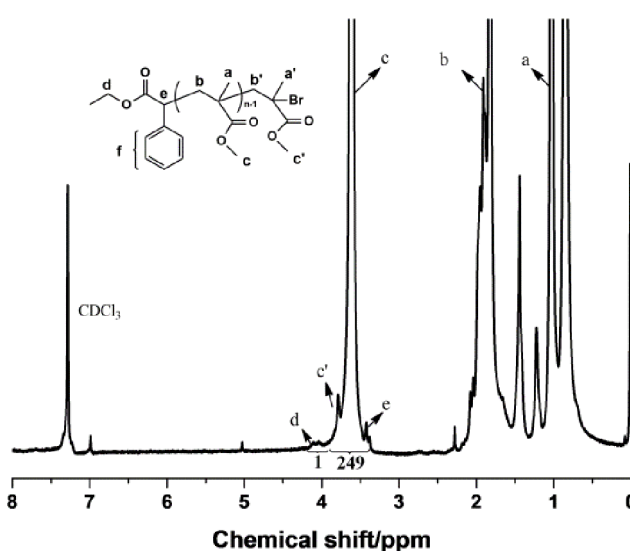

**Figure S2:**  $^1\text{H}$  NMR spectrum of PMMA ( $M_{n,\text{NMR}} = 16.8 \times 10^3$  g/mol,  $M_{n,\text{GPC}} = 15.2 \times 10^3$  g/mol,  $M_w/M_n = 1.25$ ) with  $\text{CDCl}_3$  as the solvent. Experiment conditions:  $[\text{MMA}]_0/[\text{EBPA}]_0/[\text{FeBr}_3]_0/[\text{AsAc-Na}]_0 = 200/1/0.5/1$  at  $75^\circ\text{C}$ . Solvent =  $\gamma$ -butyrolactone,  $V_{\text{MMA}} = 3$  mL,  $V_{\text{solvent}} = 1.5$  mL. Reaction time = 5 h. Conversion = 66.1%.

\* **Corresponding author: XianRong Shen**, School of Biological and Chemical Engineering, Anhui Polytechnic University, Wuhu 241000, PR China, e-mail: 10929016@zju.edu.cn.

**DengZhou Xia, YiXin Xiang and JianGang Gao**, School of Biological and Chemical Engineering, Anhui Polytechnic University, Wuhu 241000, PR China.

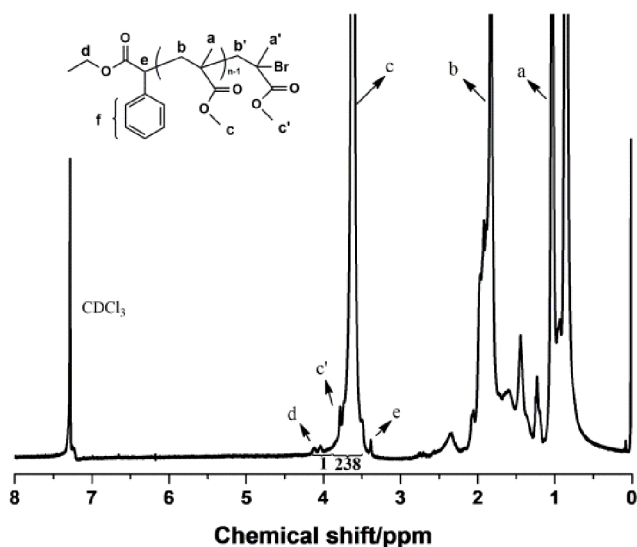

**Figure S3:**  $^1\text{H}$  NMR spectrum of PMMA ( $M_{n,\text{NMR}} = 16.1 \times 10^3$  g/mol,  $M_{n,\text{GPC}} = 13.5 \times 10^3$  g/mol,  $M_w/M_n = 1.25$ ) with  $\text{CDCl}_3$  as the solvent. Experiment conditions:  $[\text{MMA}]_0/[\text{EBPA}]_0/[\text{FeBr}_3]_0/[\text{AsAc-Na}]_0 = 200/1/0.5/1$  at  $75^\circ\text{C}$ . Solvent =  $\gamma$ -caprolactone,  $V_{\text{MMA}} = 3$  mL,  $V_{\text{solvent}} = 1.5$  mL. Reaction time = 5 h. Conversion = 59.8%.

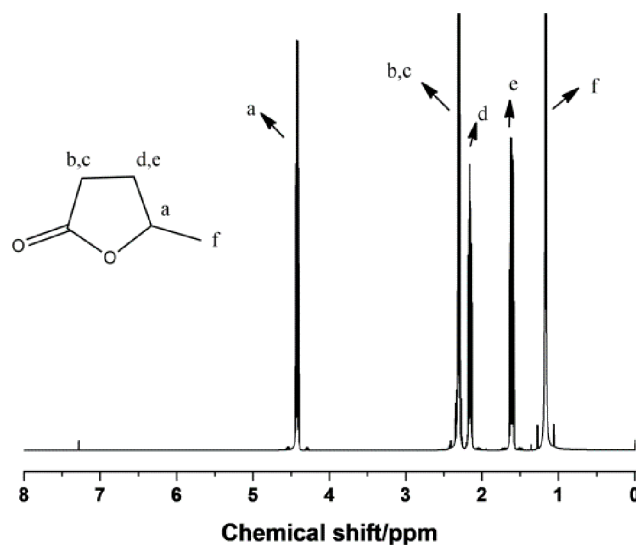

**Figure S5:**  $^1\text{H}$  NMR spectrum of  $\gamma$ -valerolactone.

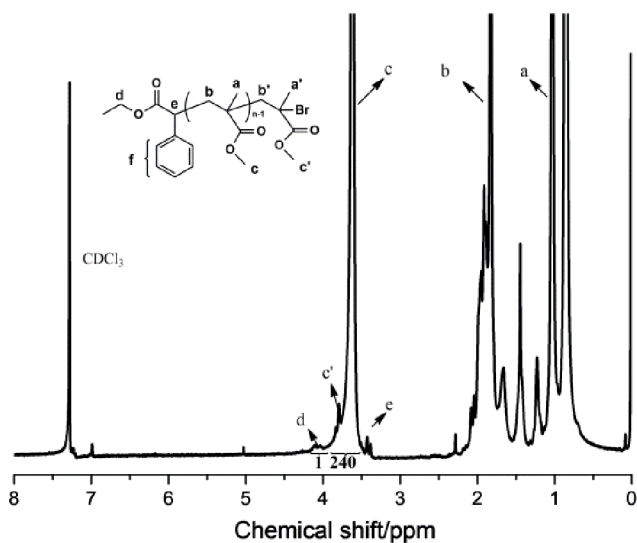

**Figure S4:**  $^1\text{H}$  NMR spectrum of PMMA ( $M_{n,\text{NMR}} = 16.3 \times 10^3$  g/mol,  $M_{n,\text{GPC}} = 13.8 \times 10^3$  g/mol,  $M_w/M_n = 1.25$ ) with  $\text{CDCl}_3$  as the solvent. Experiment conditions:  $[\text{MMA}]_0/[\text{EBPA}]_0/[\text{FeBr}_3]_0/[\text{AsAc-Na}]_0 = 200/1/0.5/1$  at  $75^\circ\text{C}$ . Solvent =  $\gamma$ -octanolactone,  $V_{\text{MMA}} = 3$  mL,  $V_{\text{solvent}} = 1.5$  mL. Reaction time = 5 h. Conversion = 61.2%.
